# Supplementary material
Source: publisher figshare collection journal article supplement (https://acs.figshare.com/ndownloader/files/4078636)
Supplement: Supplementary file 1 [file 4078636]

## SUPPORTING INFORMATION

*For*

### **Photoresponsive Dendronized Copolymers of Styrene and Maleic Anhydride Pendant with Poly(amidoamine) Dendrons as Side Groups**

Zhijian Wang, Min Gao, Jianbo Sun, Dehai Liang and Xinru Jia\*

Fax: (+86) 10 62751708

E-mail: [xrjia@pku.edu.cn](mailto:xrjia@pku.edu.cn)

#### *-Table of Contents-*

1.  $^1\text{H}$  NMR spectra of **Gn (n=1, 2, 3)**.
2.  $^1\text{H}$  NMR spectra of **PG2-NB** and **PG3-NB**.
3. DSC thermograms of **PGn-NB (n = 1, 2, 3)** copolymers.
4. The UV-Vis spectra of G1 and G3 dendrons in methanol with different irradiation time.
5. The  $^1\text{H}$  NMR spectra of **G1** and **G3** dendrons in  $\text{DMSO}-d_6$  with different irradiation time.
6. The ESI mass spectrum of **G2 dendrons** in methanol after UV irradiation for 10 hours
7. The GPC traces of **PG1-NB dendronized polymers** with DMF as the elution before and after UV irradiation for 10 hours
8. Emission spectra of pyrene (a) **PG1-NB**, (b) **PG2-NB** and (c) **PG3-NB** in water at different concentrations.
9. Dependence of the  $I_1/I_3$  ratio of pyrene on the polymer concentration of the **PGn-NB (n=1, 2, 3)** in water at 25 °C.
10.  $^1\text{H}$  NMR spectrum of **G1-2MeONB**.
11.  $^1\text{H}$  NMR spectrum of **PG1-2MeONB**.
12. Dependence of the  $I_1/I_3$  ratio of pyrene on the polymer concentration of the **PG1-2MeONB** in water at 25 °C

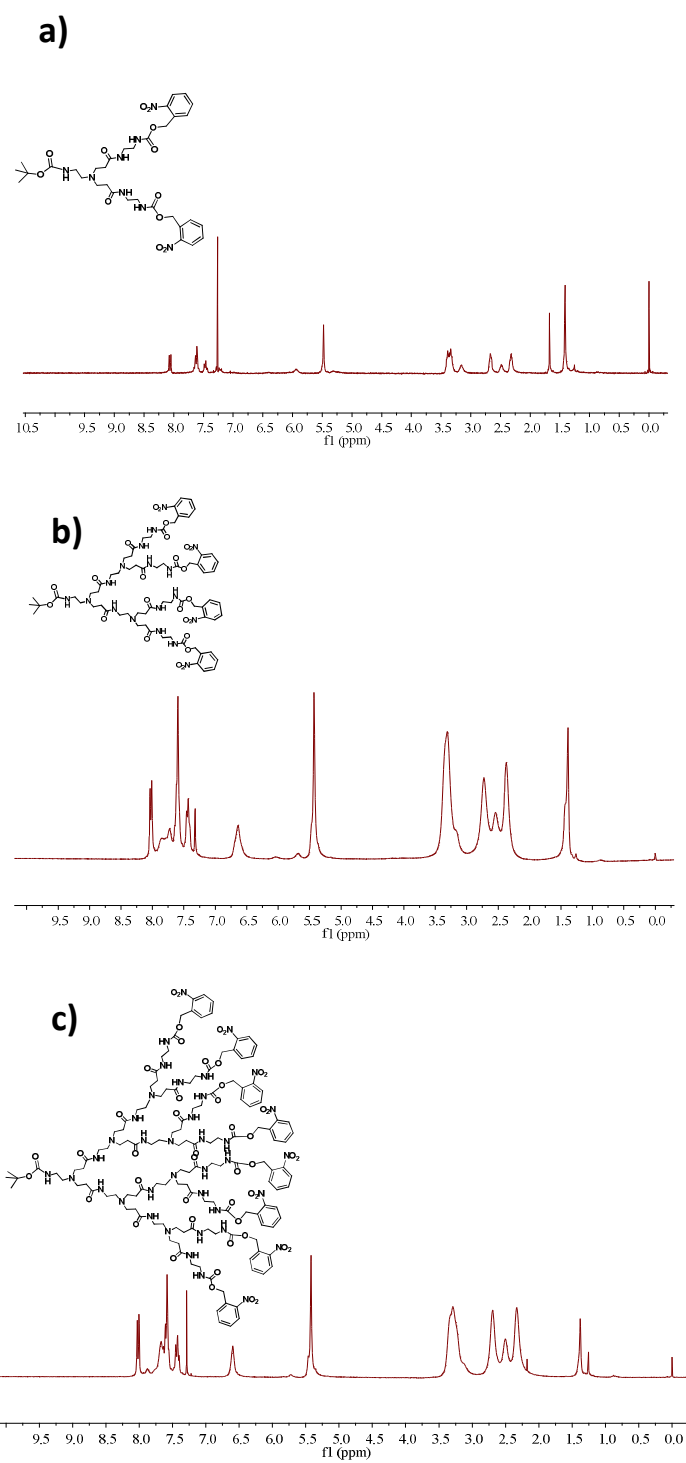

Figure S1.  $^1\text{H}$  NMR spectra of (a) **G1**, (b) **G2** and (c) **G3** dendrons in  $\text{CDCl}_3$  at room temperature

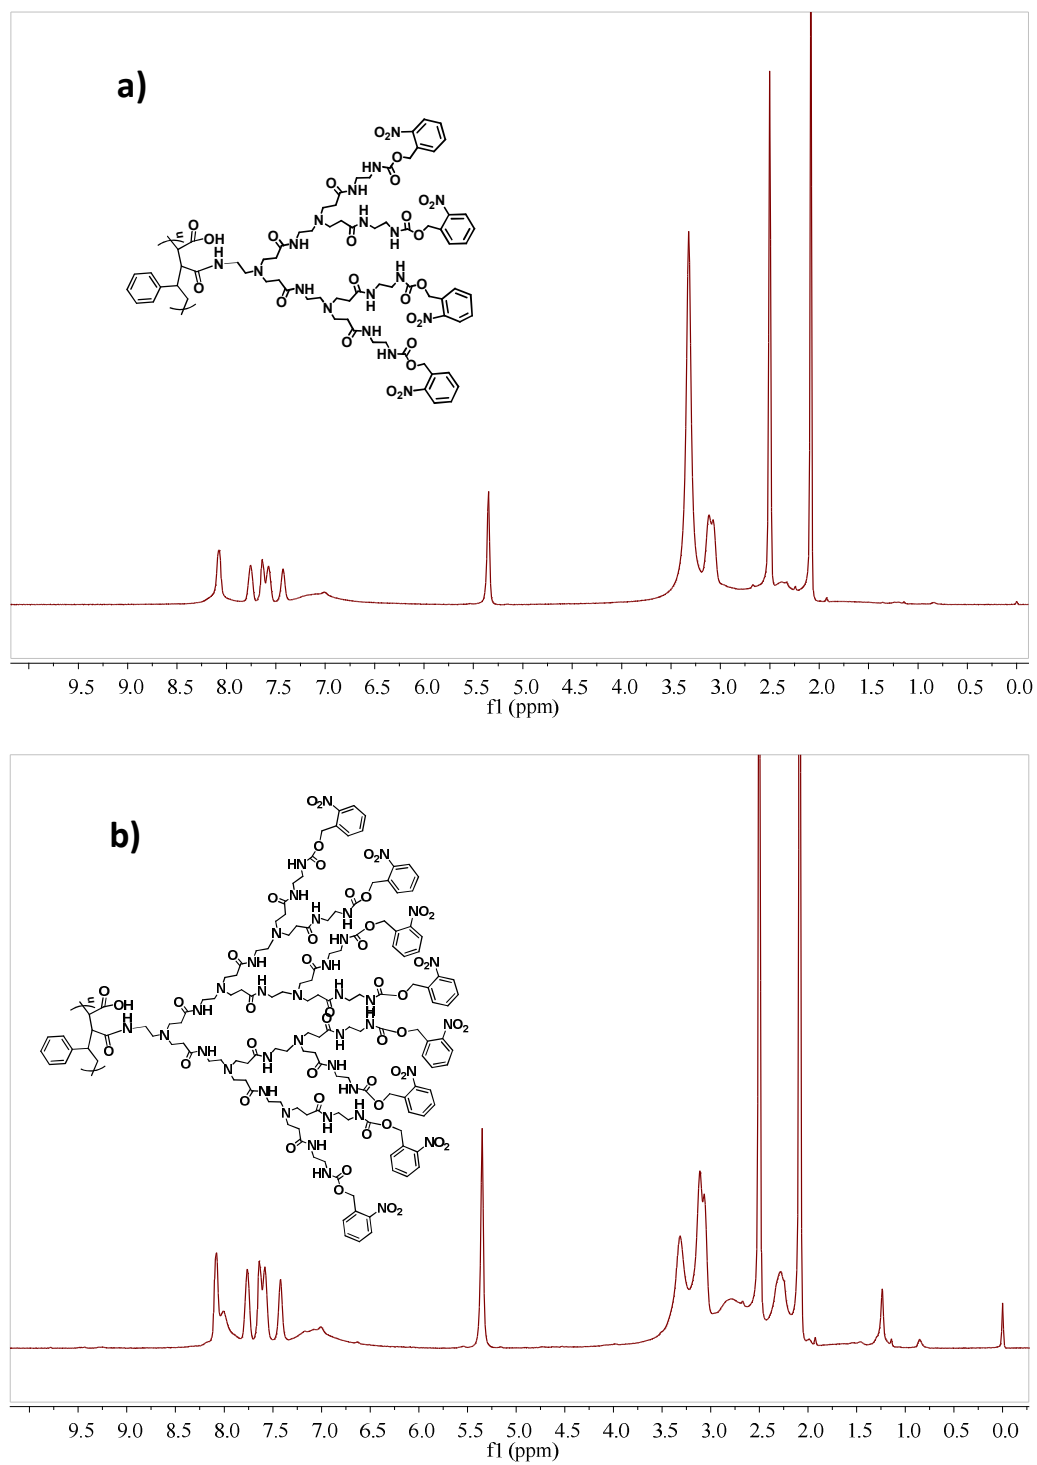

Figure S2.  $^1\text{H}$  NMR spectra of (a) **PG2-NB** and (b) **PG3-NB** in  $\text{DMSO-}d_6$  at room temperature

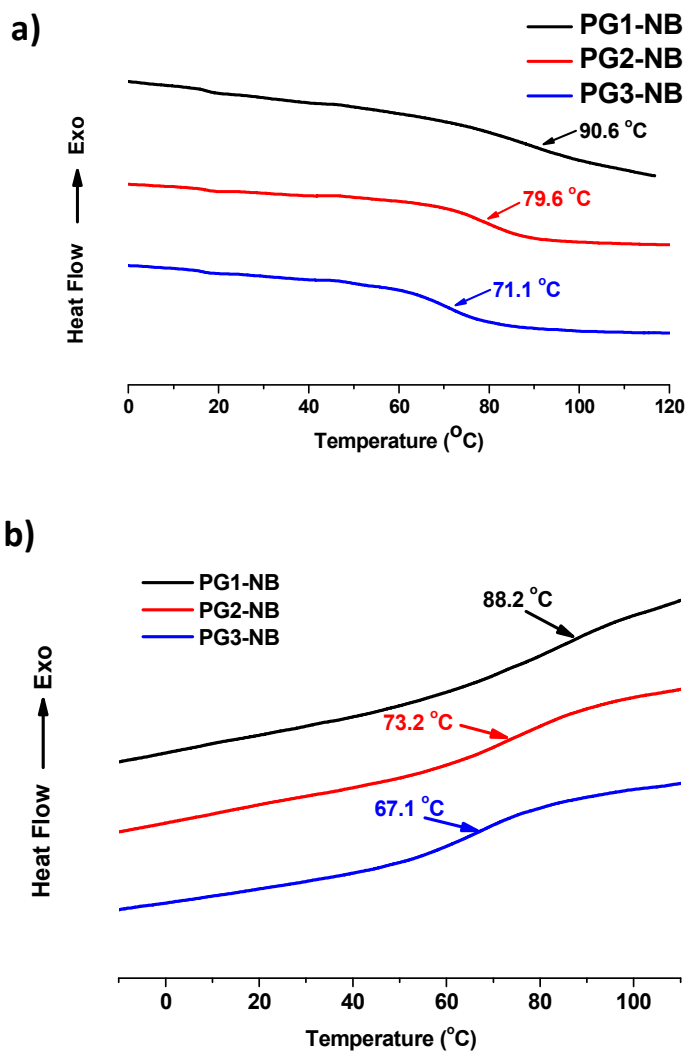

Figure S3. DSC thermograms of **PG $n$ -NB** ( $n = 1, 2, 3$ ) copolymers based on the (a) second heating scan at a heating rate of 10.0 °C /min and (b) first cooling scan at a cooling rate of 10.0 °C /min under nitrogen atmosphere. In the figure, the black, red, and blue curves represent **PG1-NB**, **PG2-NB**, and **PG3-NB**, respectively.

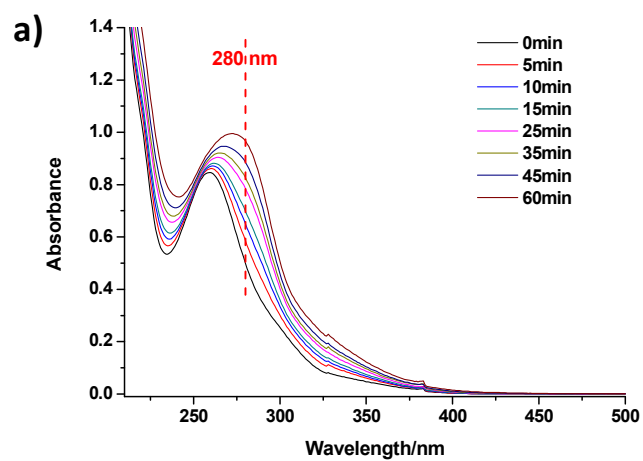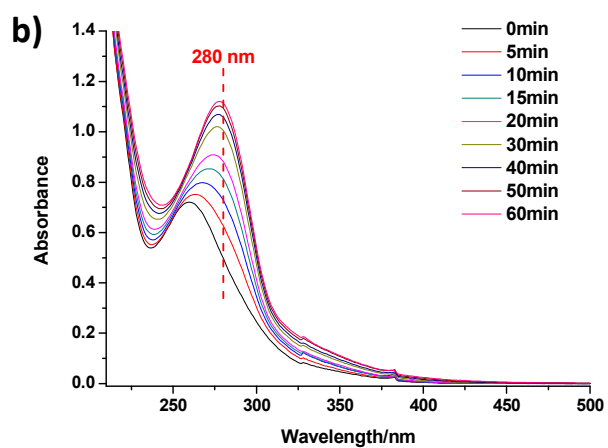

Figure S4. The UV-Vis spectra of (a) **G1** and (b) **G3 dendrons** in methanol solution with different irradiation time

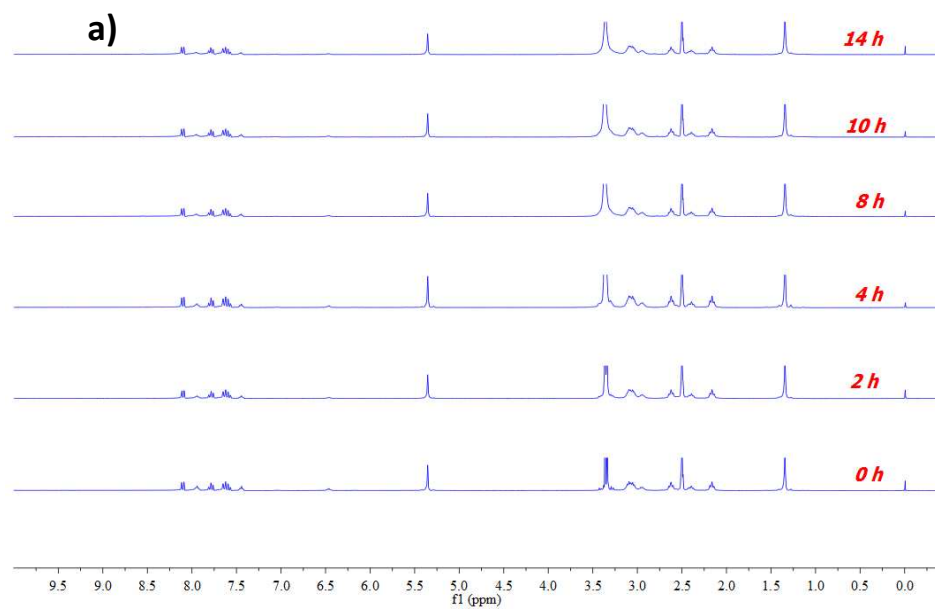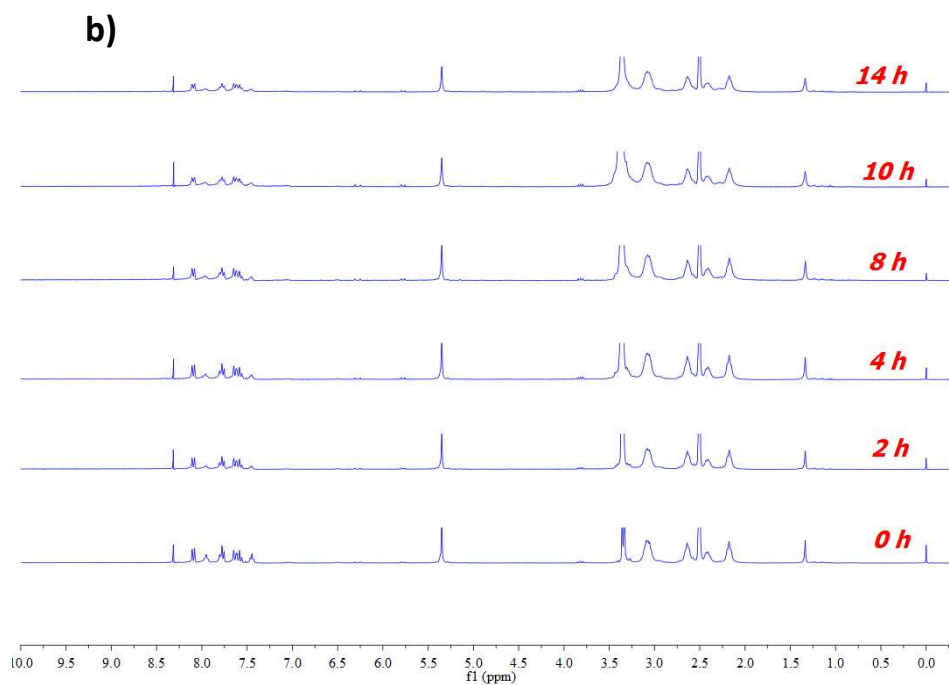

Figure S5. The  $^1\text{H}$  NMR spectra of (a) **G1 dendrons** and (b) **G3 dendrons** in  $\text{DMSO-d}_6$  with different irradiation time

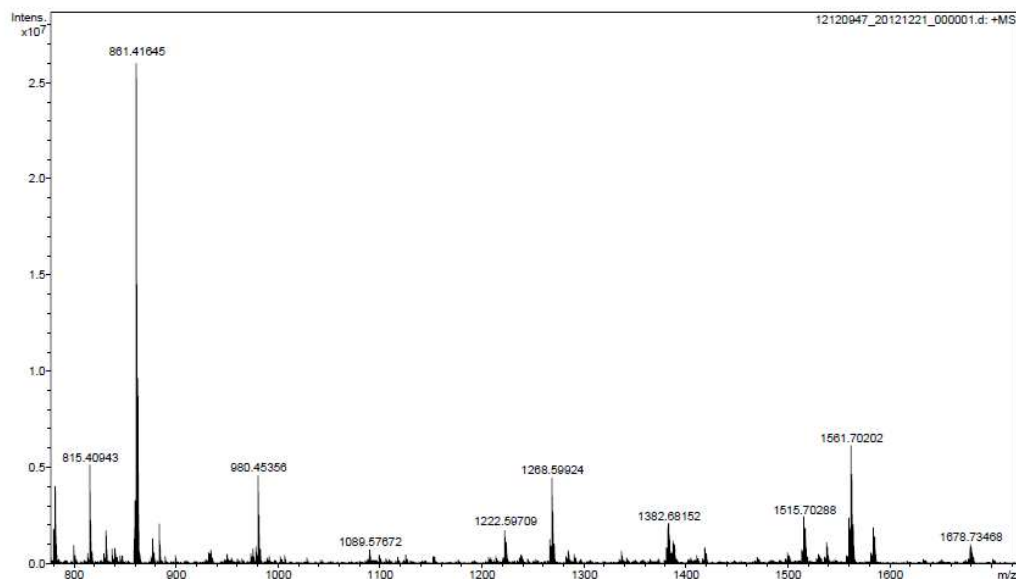

Figure S6. The ESI mass spectrum of **G2 dendrons** in methanol after UV irradiation for 10 hours

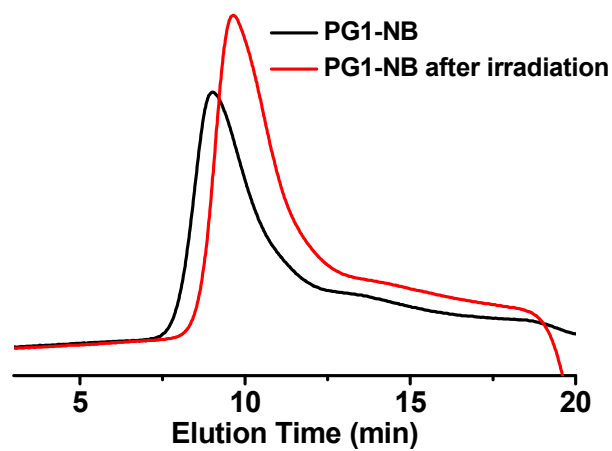

Figure S7. The GPC traces of **PG1-NB dendronized polymers** with DMF as the elution before (Black) and after (Red) UV irradiation for 10 hours

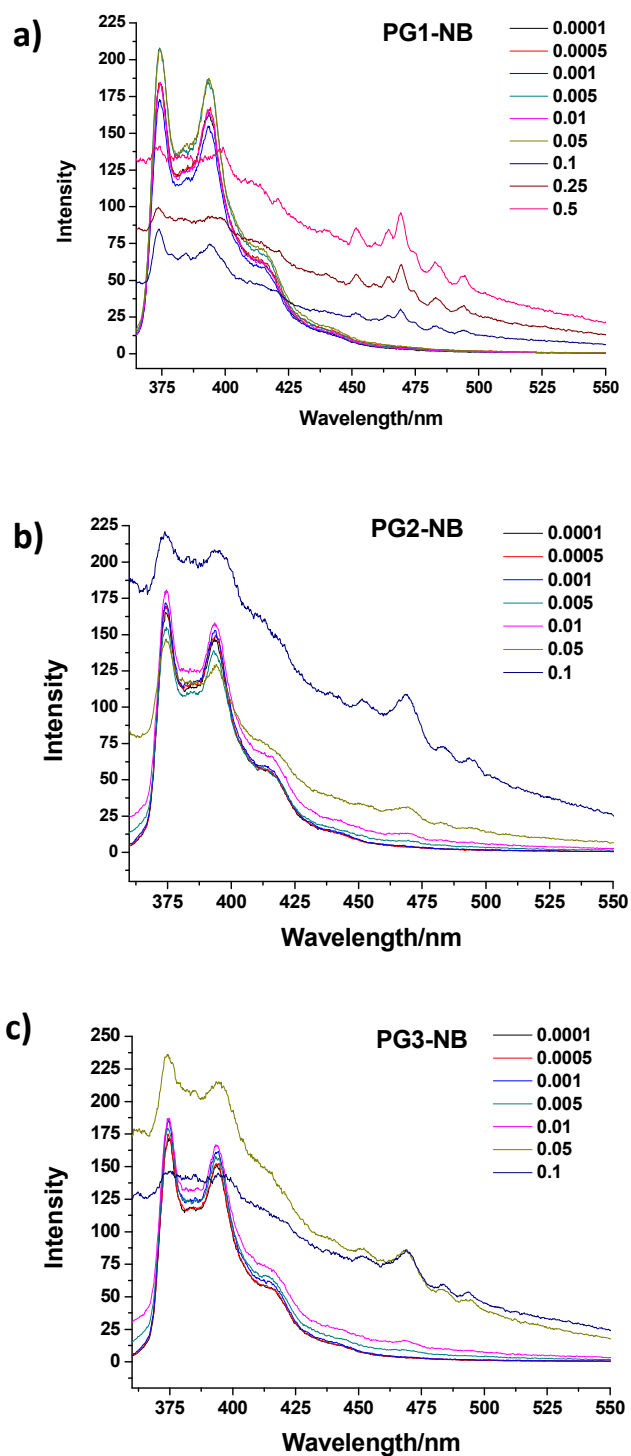

Figure S8. Emission spectra of pyrene in the solution of (a) **PG1-NB**, (b) **PG2-NB** and (c) **PG3-NB** in water at different concentrations (mg/mL). excitation wavelength = 339 nm, 25 °C



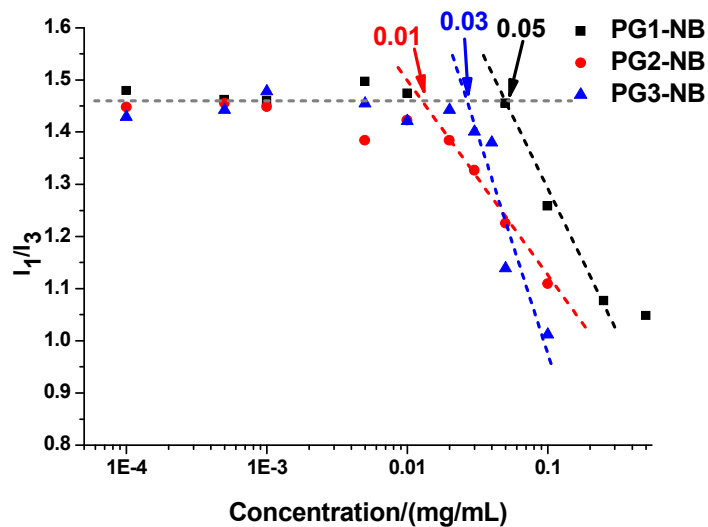

Figure S9. Dependence of the  $I_1/I_3$  ratio of pyrene on the polymer concentration of the **PGn-NB** ( $n=1, 2, 3$ ) in water at 25 °C

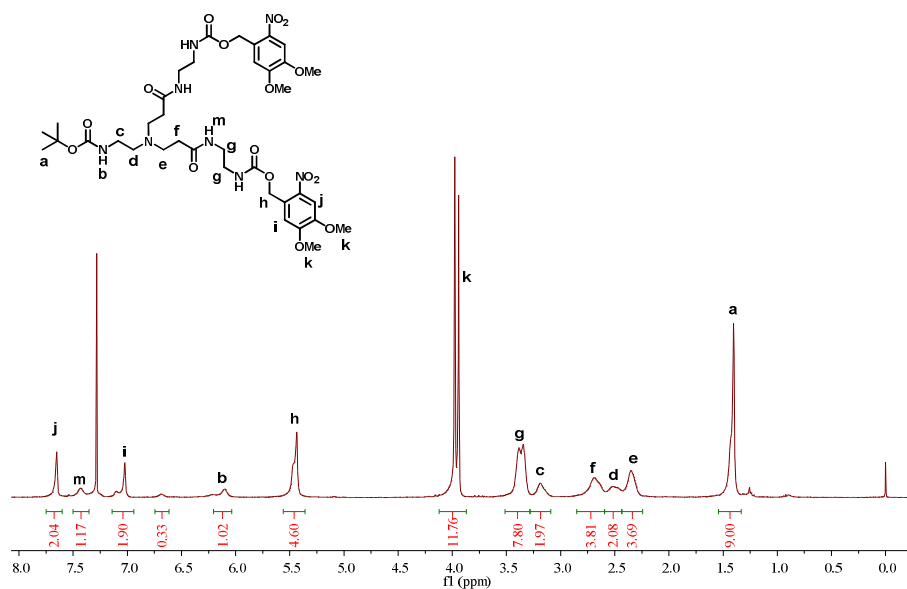

Figure S10.  $^1\text{H}$  NMR spectrum of G1-2MeONB in  $\text{CDCl}_3$  at room temperature

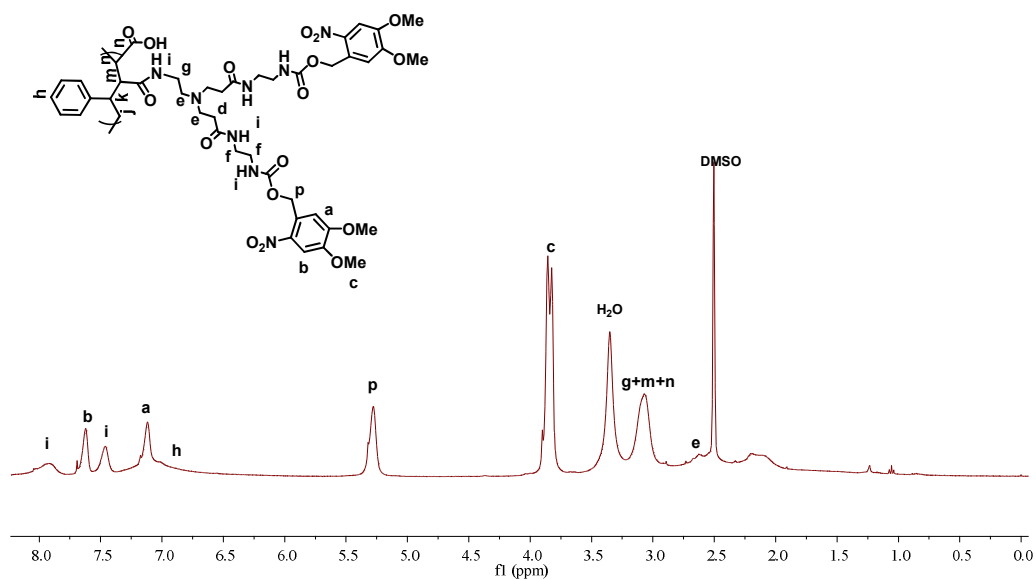

Figure S11.  $^1\text{H}$  NMR spectrum of PG1-2MeONB in  $\text{DMSO-}d_6$  at room temperature

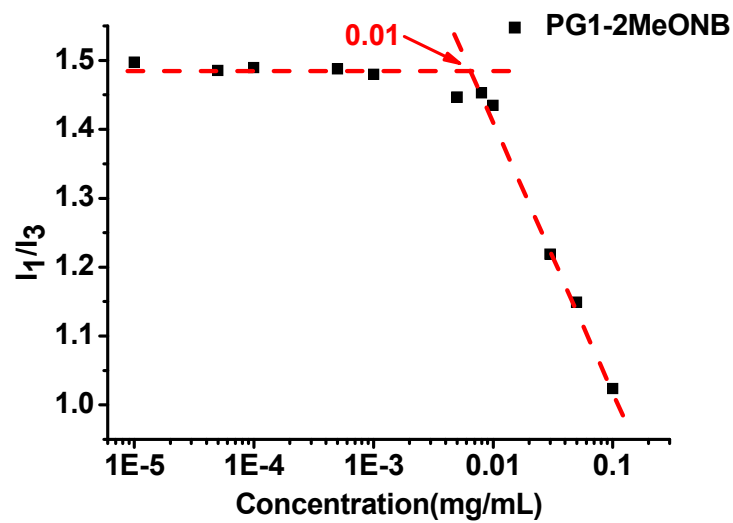

Figure S12. Dependence of the  $I_1/I_3$  ratio of pyrene on the polymer concentration of the **PG1-2MeONB** in water at 25 °C □
